# Supplementary material for: Cancer antigen 125 detection using the plasmon resonance scattering properties of gold nanorods
Source: Royal Society of Chemistry journal article supplement (doi:10.1039/c3an36614f), 2013-01-01
Supplement: c3an36614f.pdf [file c3an36614f.pdf]

## Supplementary Information

### Cancer antigen 125 detection using the plasmon resonance scattering properties of gold nanorods

**Kaixia Zhang**<sup>a,\*</sup>, **Xiaolei Shen**<sup>b,\*</sup>

<sup>a</sup> Institute of Pharmacy, JiangXi University of Traditional Chinese Medicine, Jiangxi 330004, P. R.

China. E-mail: [zhangkaixia-01@163.com](mailto:zhangkaixia-01@163.com)

<sup>b</sup> Laboratory of Cellular and Molecular Immunology, Medical School of Henan University,

Kaifeng 475004, P. R. China. E-mail: [shen--xiaolei@163.com](mailto:shen--xiaolei@163.com)

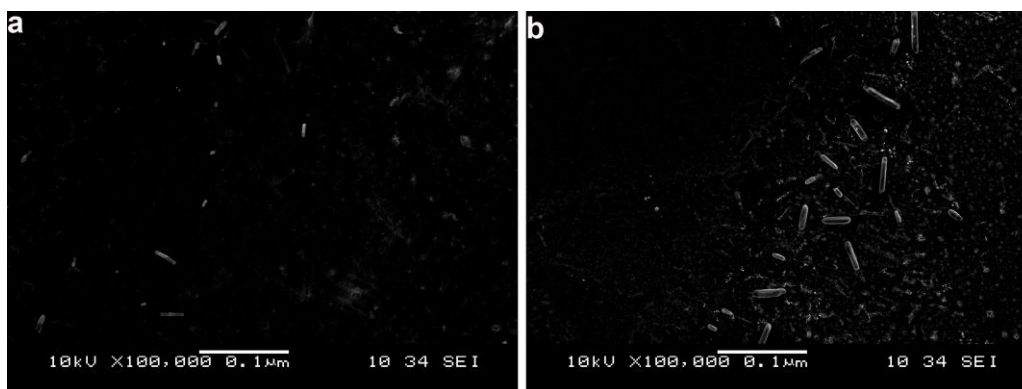

**Figure S1** (a) SEM of gold nanorods; (b) SEM of anti-CA 125 conjugated GNRs in the presence of CA 125. Conditions: 0.8 nM gold nanorods, 0.4x anti-CA 125 conjugated GNRs + 30 U mL<sup>-1</sup> CA 125.

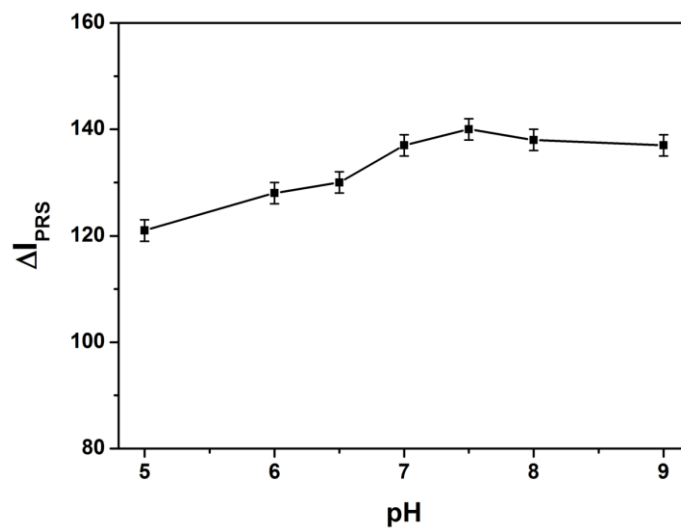

**Figure S2** Effect of pH value on detection of 30 U mL<sup>-1</sup> CA 125. Conditions: 0.4x anti-CA 125 conjugated GNRs.

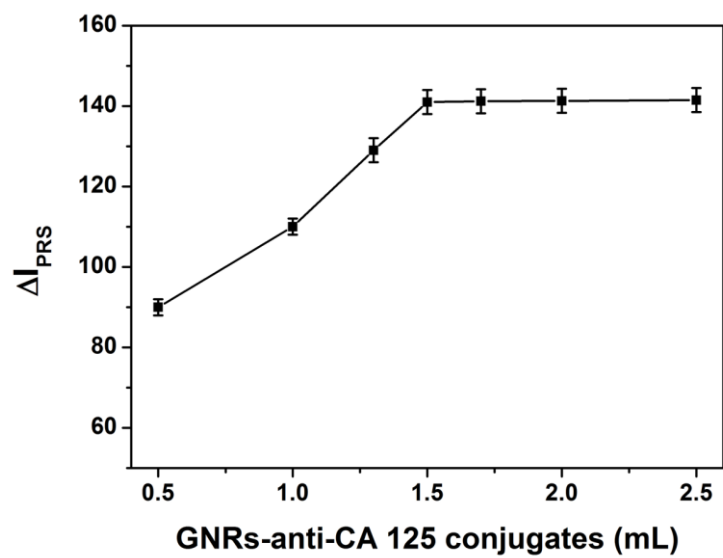

**Figure S3** Effect of anti-CA 125 conjugated GNRs concentration on detection of 30 U mL<sup>-1</sup> CA 125. Conditions: pH 7.5 PBS.
